# Supplementary material for: Δcps1 vaccine protects dogs against experimentally induced coccidioidomycosis
Source: PubMed Central journal article supplement — Vaccine. Author manuscript; Available in PMC 2022 Jun 10. (PMC9186468; doi:10.1016/j.vaccine.2021.10.029), 2021-10-23
Supplement: NIHMS1810521-supplement-Supplemental_Tables_and_Figuress.pdf [file NIHMS1810521-supplement-Supplemental_Tables_and_Figuress.pdf]

**Table S1.** Composite disease scores for dogs in vaccine-challenge study

| <b>Dog Number</b> | <b>Total Lung CFU<sup>a</sup></b> | <b>LN CFU/g<sup>a</sup></b> | <b>Recipr Titer</b> | <b>Lung Nodules (#)</b> | <b>Lymph Node Score<sup>b</sup></b> | <b>Histopath Spherule Score<sup>c</sup></b> | <b>Total Histopath Score<sup>c</sup></b> | <b>Radiology Score<sup>d</sup></b> | <b>Neutrophilia<sup>e</sup></b> | <b>Mono cytosis<sup>e</sup></b> | <b>Low Albumin<sup>f</sup></b> | <b>High Globulin<sup>f</sup></b> | <b>Recipr A/G ratio<sup>g</sup></b> | <b>Total Score</b> |
|-------------------|-----------------------------------|-----------------------------|---------------------|-------------------------|-------------------------------------|---------------------------------------------|------------------------------------------|------------------------------------|---------------------------------|---------------------------------|--------------------------------|----------------------------------|-------------------------------------|--------------------|
| <b>10K PB</b>     |                                   |                             |                     |                         |                                     |                                             |                                          |                                    |                                 |                                 |                                |                                  |                                     |                    |
| 5696              | 1.6                               | 0.0                         | 0                   | 0                       | 0                                   | 0                                           | 0                                        | 2                                  | 0                               | 0                               | 0                              | 0                                | 0.5                                 | <b>4.1</b>         |
| 5698              | 2.8                               | 0.0                         | 8                   | 8                       | 4                                   | 0                                           | 18                                       | 0                                  | 1                               | 0                               | 0                              | 0                                | 0.7                                 | <b>42.5</b>        |
| 5699              | 0.0                               | 0.0                         | 0                   | 0                       | 0                                   | 0                                           | 0                                        | 0                                  | 0                               | 0                               | 0                              | 0                                | 0.6                                 | <b>0.6</b>         |
| 5701              | 1.7                               | 1.6                         | 0                   | 0                       | 0                                   | 0                                           | 0                                        | 0                                  | 0                               | 0                               | 0                              | 0                                | 0.6                                 | <b>3.9</b>         |
| 5725              | 1.7                               | 0.0                         | 0 <sup>f</sup>      | 0                       | 0                                   | 0                                           | 2                                        | 0                                  | 0                               | 3                               | 0                              | 0                                | 0.7                                 | <b>7.4</b>         |
| 5726              | 0.0                               | 0.0                         | 0                   | 0                       | 1                                   | 0                                           | 0                                        | 0                                  | 0                               | 0                               | 0                              | 0                                | 0.6                                 | <b>1.6</b>         |
| <b>50K PB</b>     |                                   |                             |                     |                         |                                     |                                             |                                          |                                    |                                 |                                 |                                |                                  |                                     |                    |
| 5688              | 2.7                               | 1.4                         | 0                   | 0                       | 0                                   | 0                                           | 9                                        | 2                                  | 0                               | 0                               | 0                              | 0                                | 0.5                                 | <b>15.6</b>        |
| 5691              | 1.6                               | 0.0                         | 0                   | 0                       | 0                                   | 0                                           | 2                                        | 0                                  | 0                               | 0                               | 0                              | 0                                | 0.7                                 | <b>4.3</b>         |
| 5693              | 1.4                               | 0.0                         | 0                   | 0                       | 0                                   | 0                                           | 2                                        | 0                                  | 0                               | 0                               | 0                              | 0                                | 0.6                                 | <b>4.0</b>         |
| 5694              | 0.0                               | 0.0                         | 0                   | 1                       | 0                                   | 0                                           | 4                                        | 3                                  | 0                               | 0                               | 0                              | 0                                | 0.5                                 | <b>8.5</b>         |
| 5697              | 2.4                               | 0.0                         | 0                   | 0                       | 0                                   | 0                                           | 6                                        | 3                                  | 0                               | 3                               | 0                              | 0                                | 0.5                                 | <b>14.9</b>        |
| 5715              | 2.9                               | 2.4                         | 0                   | 1                       | 0                                   | 1                                           | 12                                       | 0                                  | 0                               | 1                               | 0                              | 0                                | 0.5                                 | <b>20.8</b>        |
| <b>100K PB</b>    |                                   |                             |                     |                         |                                     |                                             |                                          |                                    |                                 |                                 |                                |                                  |                                     |                    |
| 5684              | 1.4                               | 0.0                         | 0                   | 0                       | 0                                   | 0                                           | 2                                        | 0                                  | 1                               | 0                               | 0                              | 0                                | 0.7                                 | <b>5.1</b>         |
| 5702              | 3.7                               | 0.0                         | 8                   | 1                       | 3                                   | 3                                           | 25                                       | 11                                 | 1                               | 1                               | 0                              | 0                                | 0.7                                 | <b>57.4</b>        |
| 5716              | 0.0                               | 0.0                         | 0                   | 0                       | 0                                   | 0                                           | 0                                        | 0                                  | 0                               | 0                               | 0                              | 0                                | 0.5                                 | <b>0.5</b>         |
| 5719              | 0.0                               | 0.0                         | 0                   | 0                       | 0                                   | 0                                           | 2                                        | 0                                  | 0                               | 0                               | 0                              | 0                                | 0.6                                 | <b>2.6</b>         |
| 5724              | 0.0                               | 0.0                         | 0                   | 0                       | 0                                   | 0                                           | 2                                        | 0                                  | 0                               | 0                               | 0                              | 0                                | 0.7                                 | <b>2.7</b>         |
| 5728              | 0.0                               | 0.0                         | 0                   | 1                       | 0                                   | 0                                           | 0                                        | 0                                  | 1                               | 0                               | 0                              | 0                                | 0.9                                 | <b>2.9</b>         |
| <b>100K P</b>     |                                   |                             |                     |                         |                                     |                                             |                                          |                                    |                                 |                                 |                                |                                  |                                     |                    |
| 5686              | 3.2                               | 2.8                         | 0                   | 2                       | 0                                   | 0                                           | 0                                        | 0                                  | 1                               | 1                               | 0                              | 0                                | 0.8                                 | <b>10.8</b>        |
| 5689              | 4.4                               | 1.5                         | 64                  | 12                      | 4                                   | 2                                           | 19                                       | 25                                 | 1                               | 2                               | 1                              | 1                                | 1.5                                 | <b>138.4</b>       |
| 5690              | 3.9                               | 2.8                         | 8                   | 3                       | 1                                   | 1                                           | 14                                       | 0                                  | 0                               | 0                               | 0                              | 0                                | 0.7                                 | <b>34.4</b>        |
| 5714              | 3.7                               | 1.8                         | 32                  | 4                       | 4                                   | 1                                           | 23                                       | 12                                 | 3                               | 4                               | 0                              | 0                                | 0.9                                 | <b>89.4</b>        |
| 5718              | 4.6                               | 1.0                         | 4                   | 1                       | 1                                   | 0                                           | 9                                        | 9                                  | 0                               | 0                               | 0                              | 0                                | 1.1                                 | <b>30.7</b>        |
| 5727              | 3.8                               | 2.9                         | 0                   | 2                       | 0                                   | 1                                           | 20                                       | 0                                  | 1                               | 0                               | 0                              | 0                                | 0.7                                 | <b>31.4</b>        |

| <b>Control</b> |     |     |    |    |   |   |    |    |   |   |   |   |     |              |  |
|----------------|-----|-----|----|----|---|---|----|----|---|---|---|---|-----|--------------|--|
| 5685           | 4.4 | 2.2 | 0  | 16 | 4 | 3 | 53 | 17 | 3 | 3 | 0 | 0 | 1.1 | <b>106.7</b> |  |
| 5687           | 4.5 | 2.7 | 8  | 20 | 4 | 4 | 58 | 19 | 2 | 4 | 0 | 0 | 0.9 | <b>127.1</b> |  |
| 5692           | 4.6 | 2.8 | 32 | 33 | 4 | 6 | 67 | 21 | 3 | 4 | 0 | 0 | 1.1 | <b>178.4</b> |  |
| 5695           | 3.1 | 0.3 | 16 | 1  | 4 | 1 | 14 | 13 | 3 | 3 | 0 | 0 | 1.4 | <b>59.7</b>  |  |
| 5700           | 4.4 | 1.3 | 32 | 15 | 4 | 0 | 37 | 21 | 3 | 4 | 1 | 1 | 1.6 | <b>125.3</b> |  |
| 5717           | 4.6 | 2.6 | 8  | 40 | 3 | 5 | 60 | 21 | 0 | 0 | 0 | 0 | 0.7 | <b>144.9</b> |  |

<sup>a</sup> Log10 of actual value.

<sup>b</sup> 0=normal; 1=minimal; 2=mild; 3=moderate; 4=severe.

<sup>c</sup> See Suppl. Table 1.

<sup>d</sup> See Suppl. Table 2.

<sup>e</sup> Dogs were given 1 point for each bleeding time point with elevated neutrophils or monocytes.

<sup>f</sup> Dogs were assigned 1 point if globulin was elevated or albumin decreased outside reference ranges at the terminal serum collection.

<sup>g</sup> Calculated from terminal albumin and globulin values.

**Table S2.** Canine serology from prevaccination to terminal sera. MiraVista Canine Coccidioidal IgG Antibody EIA® results from pre-immunization (Vx D0) through termination at Day 56 post-challenge (Chlg D56). Terminal AGID titers are also shown.

| Dog Number     | Vx <sup>a</sup> D0 | Vx D14 | Vx D28 | Vx D42  | Chlg <sup>b</sup> D0 | Chlg D14 | Chalg D28 | Chlg D42 | Chlg D56 | Terminal AGID Titer |
|----------------|--------------------|--------|--------|---------|----------------------|----------|-----------|----------|----------|---------------------|
| <b>10K PB</b>  |                    |        |        |         |                      |          |           |          |          |                     |
| 5696           | N                  | N      | N      | N       | N                    | N        | N         | N        | N        | N                   |
| 5698           | N                  | N      | N      | N       | N                    | N        | N         | N        | N        | 1:8                 |
| 5699           | N                  | N      | N      | N       | N                    | N        | N         | N        | N        | N                   |
| 5701           | N                  | N      | N      | N       | N                    | N        | N         | N        | N        | N                   |
| 5725           | N                  | N      | N      | N       | 9.8(I) <sup>c</sup>  | N        | N         | N        | N        | N                   |
| 5726           | N                  | N      | N      | N       | N                    | N        | N         | N        | N        | N                   |
| <b>50K PB</b>  |                    |        |        |         |                      |          |           |          |          |                     |
| 5688           | N                  | N      | N      | N       | N                    | N        | N         | N        | N        | N                   |
| 5691           | N                  | N      | N      | N       | N                    | N        | 8.2(I)    | N        | N        | N                   |
| 5693           | N                  | N      | N      | N       | N                    | N        | N         | N        | N        | N                   |
| 5694           | N                  | N      | N      | N       | N                    | N        | N         | N        | N        | N                   |
| 5697           | N                  | N      | N      | N       | N                    | N        | N         | N        | 14.5(+)  | N                   |
| 5715           | N                  | N      | N      | N       | N                    | N        | N         | N        | N        | N                   |
| <b>100K PB</b> |                    |        |        |         |                      |          |           |          |          |                     |
| 5684           | N                  | N      | N      | N       | N                    | N        | N         | N        | N        | N                   |
| 5702           | N                  | N      | N      | N       | N                    | N        | 36.0(+)   | 50.6(+)  | 48.1(+)  | 1:8                 |
| 5716           | N                  | N      | N      | 21.8(+) | N                    | N        | N         | N        | N        | N                   |
| 5719           | N                  | N      | N      | N       | N                    | N        | N         | N        | N        | N                   |
| 5724           | N                  | N      | N      | N       | N                    | N        | N         | N        | N        | N                   |
| 5728           | N                  | N      | N      | N       | N                    | N        | N         | N        | N        | N                   |
| <b>100K P</b>  |                    |        |        |         |                      |          |           |          |          |                     |
| 5686           | N                  | N      | N      | N       | N                    | N        | N         | N        | N        | N                   |
| 5689           | N                  | N      | N      | N       | N                    | 26.9(+)  | 17.6(+)   | 35.4(+)  | 45.5(+)  | 1:64                |

|                |   |   |   |   |   |         |         |         |         |      |
|----------------|---|---|---|---|---|---------|---------|---------|---------|------|
| 5690           | N | N | N | N | N | 12.3(+) | 17.2(+) | N       | 32.6(+) | 1:8  |
| 5714           | N | N | N | N | N | N       | N       | N       | 23.3(+) | 1:32 |
| 5718           | N | N | N | N | N | N       | N       | N       | 84.9(+) | 1:4  |
| 5727           | N | N | N | N | N | N       | 11.8(+) | N       | N       | N    |
| <b>Control</b> |   |   |   |   |   |         |         |         |         |      |
| 5685           | N | N | N | N | N | N       | 28.3(+) | N       | 28.9(+) | N    |
| 5687           | N | N | N | N | N | N       | N       | N       | N       | 1:8  |
| 5692           | N | N | N | N | N | N       | 10.6(+) | 10.5(+) | 51.3(+) | 1:32 |
| 5695           | N | N | N | N | N | N       | N       | N       | N       | 1:16 |
| 5700           | N | N | N | N | N | N       | 10.8(+) | 37.6(+) | 34.0(+) | 1:32 |
| 5717           | N | N | N | N | N | 20.8(+) | 31.6(+) | 34.6(+) | 22.5(+) | 1:8  |

N = negative (<8 EU [EIA Units]; I = intermediate (8 - <10 EU ); (+) = positive (≥10 EU).

<sup>a</sup>V<sub>x</sub> = SC vaccination with viable arthroconidia of avirulent *ΔcpsI*

<sup>b</sup>Chlg = intratracheal inoculation (challenge) with 10,000 arthroconidia of Silveira delivered in nebulized suspension. Challenge occurred either 63 days (n=15) or 70 days (n=15) after V<sub>x</sub> day 0.

<sup>c</sup>This dog also had an AGID IgG titer of 1:4 at this time point (day 63 post-vaccination).

**Figure S1.** Disseminated rib lesion in a dog vaccinated only once (100K P).

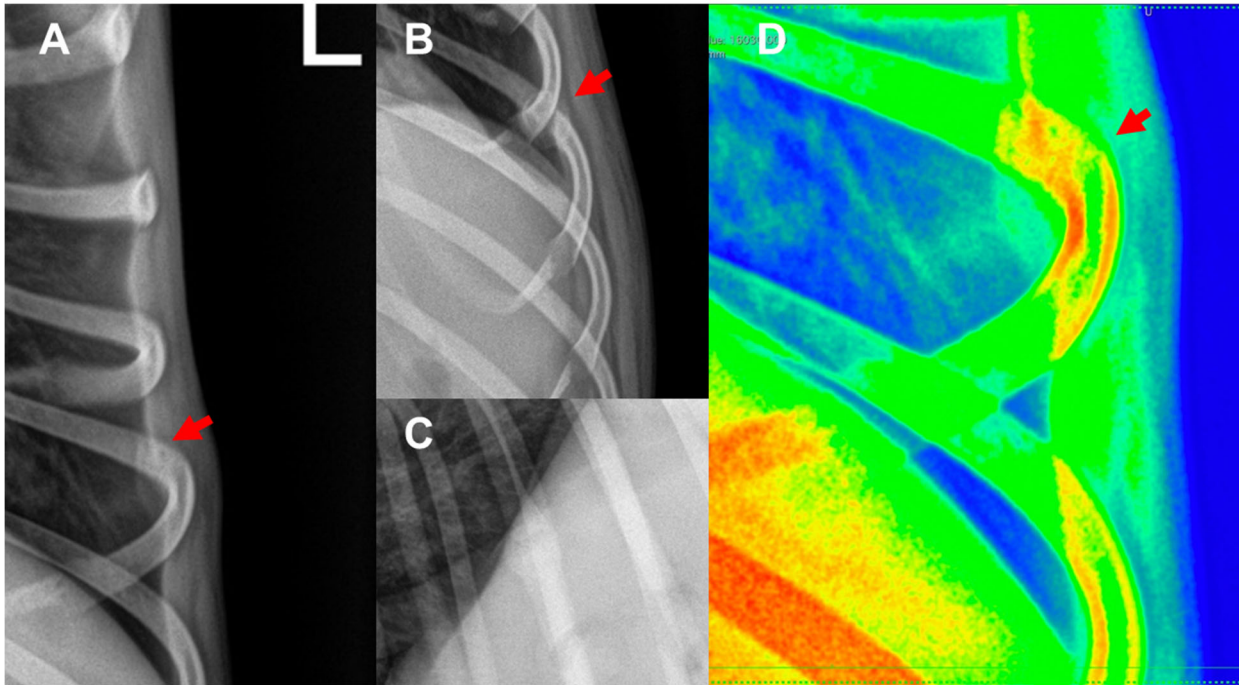

**Figure S1.** Day 14 (A) and day 56 (B and C) post-infection radiographs showing a lytic-proliferative lesion (arrows) on the left 9<sup>th</sup> rib of a dog given primary vaccination only. The lesion has enlarged by day 56. D) Colorized image of the lesion (arrow) from B that more clearly demonstrates the extent of lesion activity.

**Table S3.** Histopathology Scoring Parameters. Sections were scored in each category and the scores summed for the tissue section, then all sections for the dog.

| Score | Overall Lesion Extent | Inflammation                                     | Necrosis                        | Organisms (Intact/ruptured spherules) | Mineralization                  | Fibrosis                       |
|-------|-----------------------|--------------------------------------------------|---------------------------------|---------------------------------------|---------------------------------|--------------------------------|
| 0     | None                  | None                                             | None                            | None                                  | None                            | None                           |
| 1     | <10%                  | Focal granulomatous <sup>a</sup>                 | Single focus                    | 1-2/lesion                            | Single focus                    | Minimal fibrosis               |
| 2     | 11-30%                | ≥2 granulomatous foci, multifocal, coalescing    | ≥2 foci, multifocal             | 3-10/lesion                           | ≥2 foci, multifocal             | Equal cellularity, fibrosis    |
| 3     | 31-60%                | Focal pyogranulomatous <sup>b</sup>              | ≥2 foci, multifocal, coalescing | >10/lesion                            | ≥2 foci, multifocal, coalescing | More fibrosis than cellularity |
| 4     | >60%                  | ≥2 pyogranulomatous foci, multifocal, coalescing | Extensive, coalescing           |                                       | Extensive, coalescing           | Extensive, low cellularity     |

<sup>a</sup> Macrophages and lymphocytes only

<sup>b</sup> Macrophages, lymphocytes, neutrophils

**Table S4.** Thoracic Radiograph Scoring Parameters. Description of abnormalities and numeric assessment of lesion severity. Each Study<sup>a</sup> was scored and the scores summed for each dog.

| Pulmonary<br>Pattern<br>Distribution | Pulmonary<br>Pattern | Pulmonary<br>Lesion<br>Score | Thoracic<br>Lymphad-<br>enopathy | Lymphad-<br>enopathy<br>Score | Pleural<br>Disease | Pericardial<br>Disease | Bone<br>Lesion |
|--------------------------------------|----------------------|------------------------------|----------------------------------|-------------------------------|--------------------|------------------------|----------------|
| None                                 | Interstitial         | 0=Normal                     | None                             | 0=Normal                      | 0=No               | 0=No                   | 0=No           |
| Hilar                                | Nodular/Mass         | 1=Minimal                    | Hilar                            | 1=Minimal                     | 1=Yes              | 1=Yes                  | 1=Yes          |
| Central                              | Reticulonodular      | 2=Mild                       | Mediastinal                      | 2=Mild                        |                    |                        |                |
| Peripheral                           | Alveolar             | 3=Moderate                   | Both                             | 3=Moderate                    |                    |                        |                |
|                                      | Mineralization       | 4=Severe                     |                                  | 4=Severe                      |                    |                        |                |

<sup>a</sup>A Study consists of three views of the thorax, left and right lateral and ventrodorsal, and there were 5 studies 2 weeks apart for each dog, including the pre-infection study.
